# Supplementary material for: High-precision measurement of Eu isotopes enabled by Nd internal normalization
Source: Royal Society of Chemistry journal article supplement (doi:10.1039/d4ja00420e), 2025-01-01
Supplement: d4ja00420e1.xlsx [file d4ja00420e1.xlsx]

## Sheet: Table S1
NIST 3117a	1n(153Eu/151Eu)M	1n(146Nd/144Nd)M	1n(146Nd/145Nd)M	1n(150Nd/148Nd)M
NIST 3117a-(1)	0.10725	-0.30383	0.73953	-0.000261734
NIST 3117a-(2)	0.10718	-0.30387	0.7395	-0.000308648
NIST 3117a-(3)	0.10736	-0.30369	0.73959	-0.00013841
NIST 3117a-(4)	0.10723	-0.30387	0.73952	-0.000296044
NIST 3117a-(5)	0.10695	-0.3041	0.73941	-0.00054725
NIST 3117a-(6)	0.10688	-0.30415	0.73939	-0.000630098
NIST 3117a-(7)	0.10665	-0.30438	0.73927	-0.000822538
NIST 3117a-(8)	0.10719	-0.30386	0.73954	-0.000311348
NIST 3117a-(9)	0.10699	-0.304	0.73944	-0.000512031
NIST 3117a-(10)	0.10682	-0.3042	0.73935	-0.000660318
NIST 3117a-(11)	0.10704	-0.30397	0.73947	-0.000427491
NIST 3117a-(12)	0.10672	-0.30428	0.7393	-0.000777002
NIST 3117a-(13)	0.10692	-0.30414	0.73938	-0.000589073
NIST 3117a-(14)	0.10688	-0.30414	0.73939	-0.000611287

## Sheet: Table S2
Sample	149Sm/153Eu	δ153/151Eu (146Nd/144Nd)	2SD	δ153/151Eu (146Nd/145Nd)	2SD	δ153/151Eu (150Nd/148Nd)	2SD
NIST 3117a-(Sm1)	0.0003	-0.0150181	0.0134664	-0.00741232	0.0243583	-0.0345906	0.0261486
NIST 3117a-(Sm2)	0.0007	-0.00745126	0.0376514	0.00224614	0.0481985	-0.044554	0.0198837
NIST 3117a-(Sm3)	0.0014	-0.0167364	0.0459539	0.0079734	0.0133331	-0.0873874	0.0262212
NIST 3117a-(Sm4)	0.0034	-0.0155905	0.0126078	0.0134762	0.0141198	-0.148132	0.0261452
NIST 3117a-(Sm5)	0.0057	-0.0500728	0.024585	0.0046719	0.0259743	-0.311061	0.0430736
NIST 3117a-(Sm6)	0.0075	-0.0771876	0.0482174	0.0014974	0.0121986	-0.38619	0.0302739
NIST 3117a-(Sm7)	0.0116	-0.117167	0.0262247	-0.0073001	0.030295	-0.60706	0.0971734
NIST 3117a-(Sm8)	0.0163	-0.173916	0.0234717	-0.00629013	0.0138821	-0.824359	0.0755358
Sample	154Gd/153Eu	δ153/151Eu (146Nd/145Nd)	2SD
NIST 3117a-(Gd1)	0.0191	-0.0206219	0.0198487
NIST 3117a-(Gd2)	0.0382	0.0142063	0.00259242
NIST 3117a-(Gd3)	0.102	-0.0190171	0.0395313
NIST 3117a-(Gd4)	0.17	-0.0129835	0.0133541
NIST 3117a-(Gd5)	0.2175	0.0134368	0.0380914

## Sheet: Table S3
Nu 1700
NIST 3117a	1n(146Nd/145Nd)M	1n(153Eu/151Eu)M
run on Apr/8/2024	0.73961	0.10723
	0.73956	0.10707
	0.73958	0.10711
	0.7395	0.10698
	0.73952	0.10705
	0.7394	0.10674
	0.73955	0.10708
	0.73959	0.10711
	0.7395	0.10694
	0.73948	0.10694
	0.73929	0.10651
	0.73935	0.10661
	0.73928	0.10652
	0.73933	0.10652
	0.73951	0.10698
	0.73924	0.10637
	0.73923	0.10639
	0.73928	0.10647
	0.73904	0.10594
	0.73914	0.10616
	0.73952	0.10702
	0.73894	0.10585
	0.73937	0.10677
	0.73936	0.10675
	0.73921	0.10638
	0.73874	0.10535
run on Apr/9/2024	0.73962	0.1073
	0.73958	0.10725
	0.73959	0.10727
	0.73975	0.10758
	0.73964	0.10734
	0.73957	0.10722
	0.73949	0.10705
	0.73943	0.10689
	0.73939	0.10682
	0.73931	0.10665
	0.73931	0.10667
	0.73924	0.10652
run on Apr/10/2024	0.73893	0.10607
	0.73883	0.10591
	0.73916	0.10656
	0.73887	0.106
	0.73864	0.10553
	0.73835	0.10496
	0.73785	0.10388
	0.7375	0.1032
	0.73668	0.10144
	0.73879	0.10582
	0.73731	0.10272
	0.73849	0.10521
	0.73766	0.1035
Neptune Plus
NIST 3117a	1n(146Nd/145Nd)M	1n(153Eu/151Eu)M
Batch 1	0.738723	0.105789
	0.738706	0.105853
	0.738766	0.106
	0.738762	0.105963
	0.738788	0.106041
	0.738835	0.106121
	0.738812	0.106084
	0.738867	0.1062
	0.73885	0.106162
	0.738841	0.106157
	0.738727	0.105948
	0.7387	0.105883
	0.738663	0.10577
	0.738383	0.105213
	0.738575	0.105581
	0.738412	0.105286
	0.738418	0.105261
Batch 2	0.739313	0.106828
	0.739261	0.106717
	0.739249	0.10672
	0.738972	0.106154
	0.738975	0.106202
	0.738981	0.106136
	0.738918	0.10605
	0.738934	0.106108
	0.738909	0.105997
	0.738921	0.106054
	0.738915	0.106045
	0.738907	0.106034
	0.739194	0.106631
	0.739174	0.106604
	0.739207	0.106663
	0.739125	0.106475
	0.73908	0.106372
	0.739129	0.106465
	0.739132	0.106474
	0.739187	0.106609
	0.739206	0.106596
	0.73922	0.106605
Batch 3	0.738538	0.105651
	0.738519	0.105618
	0.738671	0.105926
	0.738631	0.105881
	0.738644	0.105944
	0.738648	0.105892
	0.738618	0.105842
	0.738657	0.105941
	0.738707	0.106028
	0.738733	0.106101
	0.738735	0.106119
	0.738774	0.106161
	0.73876	0.106208
	0.738797	0.10626
	0.738777	0.106209
	0.738738	0.1061
	0.738746	0.106137

## Sheet: Table S4
NIST 3117a	Exponential law		Power law
	δ153/151Eu	2SE	δ153/151Eu	2SE
NIST 3117a-(1)	0.0265893	0.04	0.0146984	0.04
NIST 3117a-(2)	-0.0155865	0.03	-0.00652445	0.03
NIST 3117a-(3)	-0.00412586	0.03	-0.00486205	0.03
NIST 3117a-(4)	0.0348432	0.05	-0.0345517	0.04
NIST 3117a-(5)	-0.0389681	0.04	0.0140492	0.04
NIST 3117a-(6)	0.0288831	0.04	0.00610082	0.04
NIST 3117a-(7)	-0.0096275	0.04	-0.00481676	0.04
NIST 3117a-(8)	0.0187971	0.04	0.0100603	0.04
NIST 3117a-(9)	-0.014671	0.04	-0.0188338	0.04
NIST 3117a-(10)	-0.03576	0.04	-0.0148212	0.04
NIST 3117a-(11)	-0.00504363	0.03	-0.00730799	0.03
NIST 3117a-(12)	-0.00917025	0.04	9.75169e-05	0.04
NIST 3117a-(13)	0.0100873	0.04	0.0189806	0.04
NIST 3117a-(14)	-0.0146722	0.04	-0.0180872	0.04
NIST 3117a-(15)	0.0151309	0.04	-0.00546478	0.03
NIST 3117a-(16)	0.00320956	0.04	0.0242304	0.04
NIST 3117a-(17)	-0.0137552	0.03	-0.0082807	0.03
NIST 3117a-(18)	0.0114628	0.04	-0.00704205	0.04
NIST 3117a-(19)	-0.0123797	0.03	-0.000820302	0.03
NIST 3117a-(20)	0.00779467	0.04	-0.0127934	0.04
NIST 3117a-(21)	-0.00275103	0.03	0.0258933	0.03
NIST 3117a-(22)	-0.00458503	0.03	-0.00734738	0.03
NIST 3117a-(23)	0.0394324	0.04	0.0165245	0.04
NIST 3117a-(24)	-0.00641913	0.04	0.00554825	0.04
NIST 3117a-(25)	-0.0233846	0.03	-0.0274141	0.03
NIST 3117a-(26)	-0.0105461	0.04	-0.0126225	0.04
NIST 3117a-(27)	0.0128387	0.04	-0.00102346	0.04
NIST 3117a-(28)	0.0238435	0.04	0.0401962	0.04
NIST 3117a-(29)	-0.0417253	0.03	-0.042824	0.03
NIST 3117a-(30)	0.0284292	0.04	0.0353431	0.04
NIST 3117a-(31)	-0.00779499	0.03	-0.0212454	0.03
NIST 3117a-(32)	-0.0142144	0.03	-0.0126813	0.03
NIST 3117a-(33)	0.0417275	0.04	0.0343208	0.04
NIST 3117a-(34)	-0.0224686	0.04	-0.0117164	0.04
NIST 3117a-(35)	0.0169664	0.05	0.00203748	0.03
NIST 3117a-(36)	-0.000458571	0.04	0.0278049	0.04
NIST 3117a-(37)	0.0302663	0.04	0.010733	0.04
NIST 3117a-(38)	0.0385153	0.04	0.0398145	0.04
NIST 3117a-(39)	0.0027512	0.04	-0.000709956	0.03
NIST 3117a-(40)	0.0302628	0.04	0.0213765	0.04
NIST 3117a-(41)	0.0224681	0.05	0.0215766	0.04
NIST 3117a-(42)	0.00687708	0.03	0.00270197	0.03
NIST 3117a-(43)	-0.0128373	0.04	0.00541403	0.04
NIST 3117a-(44)	-0.00137544	0.03	-0.0170115	0.03
NIST 3117a-(45)	0.0114621	0.03	0.0125774	0.03
NIST 3117a-(46)	0.000916974	0.04	0.00821039	0.04
NIST 3117a-(47)	-0.00871136	0.04	-0.01701	0.04
NIST 3117a-(48)	0	0.03	0.00469021	0.03
NIST 3117a-(49)	-0.00229249	0.04	-0.00628747	0.04
NIST 3117a-(50)	0.0151307	0.04	0.00935504	0.04
NIST 3117a-(51)	-0.0110042	0.04	0.0194079	0.04
NIST 3117a-(52)	0.0385168	0.03	0.0117176	0.03
NIST 3117a-(53)	0.000917181	0.04	0.00789634	0.04
NIST 3117a-(54)	0.0256823	0.03	0.0320102	0.03
NIST 3117a-(55)	0.00321045	0.04	0.00601805	0.04
NIST 3117a-(56)	0	0.03	-0.0108426	0.03
NIST 3117a-(57)	-0.00825694	0.04	-0.00767772	0.04
NIST 3117a-(58)	0.0257004	0.03	0.0097921	0.03
NIST 3117a-(59)	-0.00688144	0.04	0.0336499	0.04
NIST 3117a-(60)	0.0348678	0.04	0.00212171	0.04
NIST 3117a-(61)	-0.00825936	0.04	0.0136389	0.04
NIST 3117a-(62)	-0.0247796	0.03	0.00479695	0.03
NIST 3117a-(63)	0.0261596	0.04	0.0241364	0.04
NIST 3117a-(64)	0.00687557	0.02	0.0226402	0.02
NIST 3117a-(65)	-0.00916727	0.03	-0.0200428	0.03
NIST 3117a-(66)	0.0119175	0.04	0.0215833	0.04
NIST 3117a-(67)	0.0169596	0.04	0.00704965	0.04
NIST 3117a-(68)	-0.0265853	0.04	-0.0268214	0.04
NIST 3117a-(69)	-0.0132926	0.03	-0.00398028	0.03
NIST 3117a-(70)	0.0265852	0.04	0.0263061	0.04
NIST 3117a-(71)	-0.0114588	0.04	-0.0142465	0.04
NIST 3117a-(72)	0.0142092	0.03	0.0250514	0.03
NIST 3117a-(73)	0.0297944	0.03	0.00607877	0.03
NIST 3117a-(74)	-0.020628	0.03	0.00684458	0.03
NIST 3117a-(75)	0.00962653	0.04	0.0137653	0.04
NIST 3117a-(76)	-0.0380491	0.04	-0.0375972	0.04
NIST 3117a-(77)	0	0.04	0.0195925	0.03
NIST 3117a-(78)	0.027505	0.04	-0.00435839	0.04
NIST 3117a-(79)	0.0270471	0.04	-0.00438847	0.04
Average	0.00370347		0.00347314
2SD	0.0404442		0.0362953

## Sheet: Table S5
Sample	149Sm/153Eu	δ153/151Eu (146Nd/144Nd)	2SD	δ153/151Eu (146Nd/145Nd)	2SD	δ153/151Eu (150Nd/148Nd)	2SD
BCR-2-(1)	0.00771278	-0.0824187	0.0124956	-0.0108507	0.0152419	-0.252956	0.0358905
BCR-2-(2)	0.00956265	-0.00343564	0.0836813	0.00848524	0.0693755	-0.194061	0.0770651
BCR-2-(3)	0.0164351	-0.085791	0.0271595	-0.00733676	0.0337491	-0.410168	0.0304303
BCR-2-(4)	0.0202847	-0.116507	0.0210997	-0.0307146	0.0425421	-0.52742	0.0287767
BHVO-2-(1)	0.00887224	-0.0362314	0.0170242	0.0192515	0.0346528	-0.15304	0.02346
BHVO-2-(2)	0.0102368	-0.0640039	0.0279179	-0.0192618	0.0505899	-0.203726	0.0162852
BHVO-2-(3)	0.0110035	-0.0555005	0.0341045	-0.00733766	0.0525071	-0.259351	0.0778178
BHVO-2-(4)	0.0116637	-0.0371484	0.0164737	0.0155841	0.0408854	-0.242839	0.0227261
BHVO-2-(5)	0.0132107	-0.0804326	0.0290291	-0.0161996	0.0778376	-0.290698	0.00517831
BHVO-2-(6)	0.0150513	-0.0394417	0.0154465	-0.00229181	0.030802	-0.32852	0.0225428
SY-3-(1)	0.012192	-0.169276	0.0155685	-0.1254	0.0641912	-0.389078	0.00648556
SY-3-(2)	0.0153757	-0.200009	0.0162576	-0.163226	0.0276933	-0.464237	0.0240138
SY-3-(3)	0.0317204	-0.279758	0.159475	-0.127327	0.0326477	-0.831655	0.221677
SY-3-(4)	0.0403219	-0.329422	0.0491717	-0.140598	0.0432717	-1.0583	0.10915
SY-3-(5)	0.0519803	-0.414038	0.0419288	-0.151894	0.0251971	-1.37966	0.0572671
SY-3-(6)	0.0571631	-0.375755	0.0222058	-0.125192	0.0522779	-1.43173	0.0296979
SY-3-(7)	0.0868482	-0.544136	0.0227564	-0.130692	0.0388866	-2.16276	0.0320816
SY-3-(8)	0.102198	-0.622244	0.0032561	-0.13708	0.0544591	-2.46102	0.0123275
